# Supplementary material for: Hepatic arginase 2 (Arg2) is sufficient to convey the therapeutic metabolic effects of fasting
Source: PubMed Central journal article supplement (PMC6453920; doi:10.1038/s41467-019-09642-8), 2019-04-08
Supplement: 41467_2019_9642_MOESM1_ESM.pdf [file 41467_2019_9642_MOESM1_ESM.pdf]

## Supplementary Information

Hepatic Arginase 2 (Arg2) is sufficient to convey the  
therapeutic metabolic effects of fasting

Zhang et al.



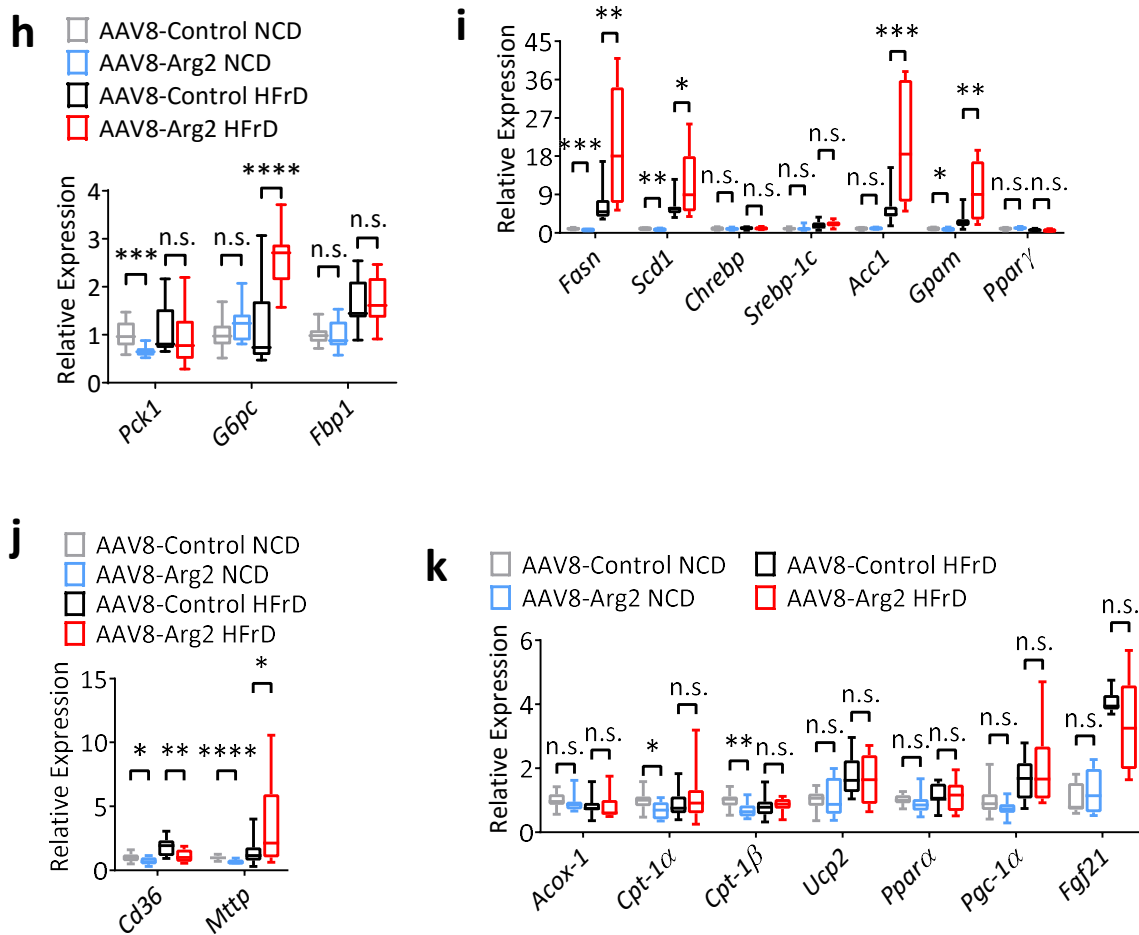

**Supplementary Figure 1.** Improved energy metabolism in HFrD-fed mice overexpressing hepatocyte Arg2. (a) Upper panel: hepatic, interscapular brown adipose tissue (iBAT) and skeletal muscle (SKM) mRNA in AAV8-Control and AAV8-Arg2 mice; Middle panel: hepatic Arg2 protein and densitometric quantification in AAV8-Control and AAV8-Arg2 mice; Lower panel: Hepatic Arg1 and Arg2 expression in AAV8-Control and AAV8-Arg2 mice. (b) Food intake in NCD and HFrD-fed mice treated with AAV8-control or AAV8-Arg2 virus. (c) Light- and dark-cycle movement. (d) Serum triglyceride, cholesterol, non-esterified fatty acid, and LDL-C content in NCD and HFrD-fed mice treated with AAV8-control or AAV8-Arg2 virus. (e) Intraperitoneal glucose tolerance test (GTT) and insulin tolerance test (ITT) (n = 5 mice per group). (f) Liver weight and liver weight-to-body weight ratios in NCD and HFrD-fed mice treated with AAV8-control or AAV8-Arg2 virus (n = 6-8 mice). (g) Serum alanine aminotransferase (ALT), aspartate aminotransferase (AST) and albumin in chow- and HFrD-fed AAV8-Control and AAV8-Arg2 mice. (h) Hepatic mRNA expression of gluconeogenic genes. (i) Hepatic mRNA expression of genes related in fatty acid synthesis. (j) Hepatic mRNA expression of genes related in fatty acid intake and export. (k) Hepatic mRNA expression of genes related in fatty acid  $\beta$ -oxidation. (n = 6-8 mice per group). For bar graphs, data represent mean + s.e.m. For box plots, the midline represents the median, boxes represent the interquartile range and whiskers show the full range of values. \* $P < 0.05$ , \*\* $P < 0.01$ , \*\*\* $P < 0.005$ , \*\*\*\* $P < 0.0001$  relative to vehicle treatment, by two-tailed Student's t-test.

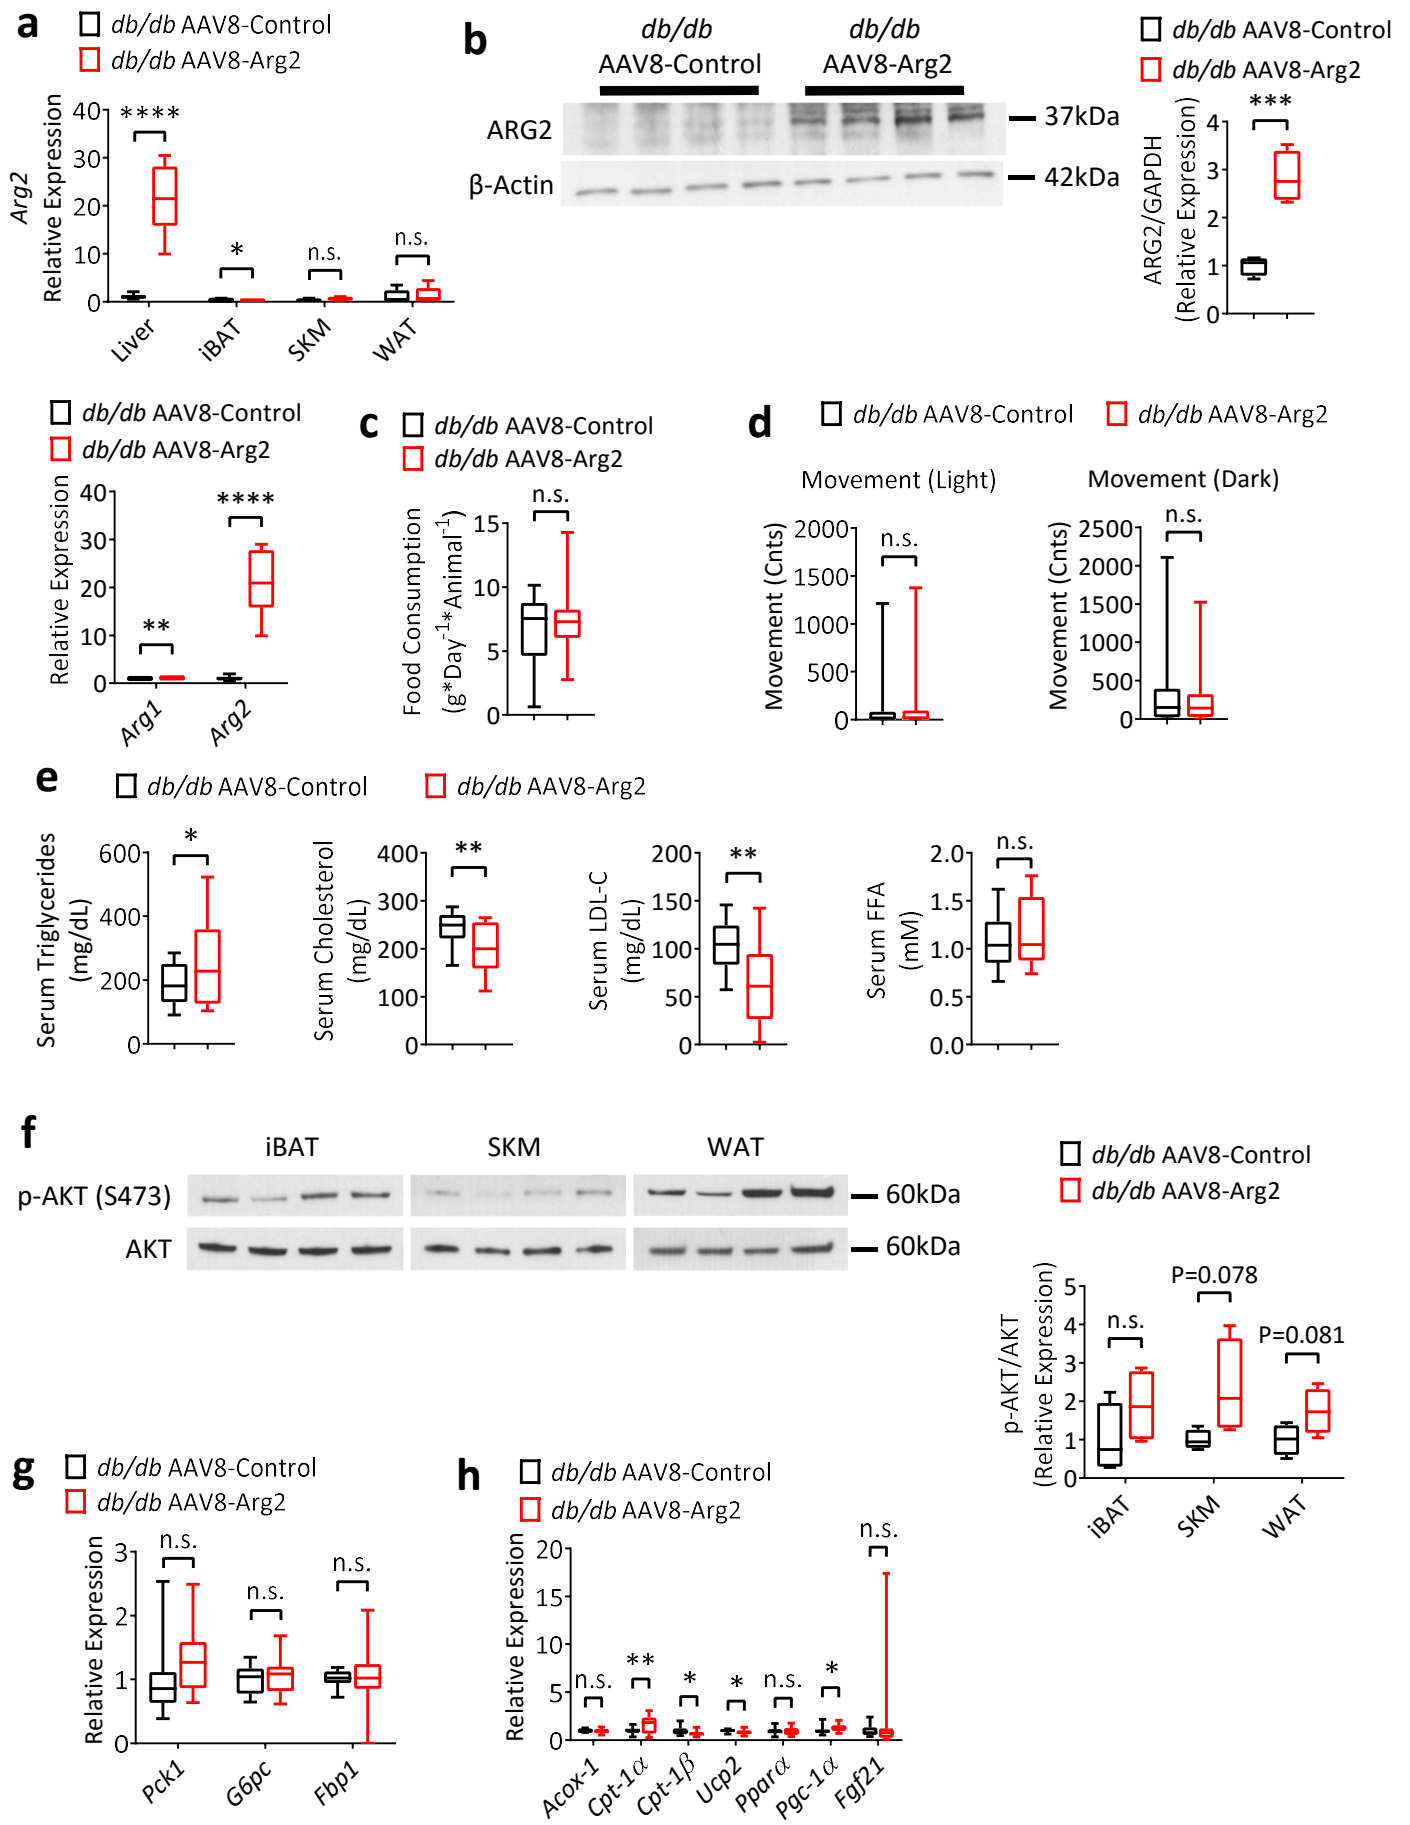

**Supplementary Figure 2.** Improved energy metabolism in *db/db* mice overexpressing hepatocyte Arg2. **(a)** Left, Hepatic and extrahepatic Arg2 mRNA expression in *db/db* AAV8-Control and AAV8-Arg2 mice; Right, Hepatic Arg1 and Arg2 mRNA expression in *db/db* AAV8-Control and AAV8-Arg2 mice (n = 8 mice per group). **(b)** Arg2 immunoblot analysis and densitometric quantification of immunoblots in livers of *db/db* AAV8-Control and AAV8-Arg2 mice (n = 4 per group).  $\beta$ -actin was probed as a loading control. **(c)** Food consumption in *db/db* AAV8-Control and AAV8-Arg2 mice. **(d)** Light and dark cycle locomotion in *db/db* AAV8-control and Arg2 mice (n = 8 mice per group). **(e)** Serum triglyceride, cholesterol, non-esterified fatty acid, and LDL-C in *db/db* AAV8-Control and AAV8-Arg2 mice (n = 8 mice per group). **(f)** Phosphorylated Akt immunoblot and quantification of immunoblot band density in iBAT, SKM and WAT from *db/db* AAV8-Control or AAV8-Arg2 mice. **(g)** Hepatic gluconeogenic and oxidative gene mRNA expression by qPCR in *db/db* AAV8-Control and AAV8-Arg2 mice (n = 8 mice per group). For boxes represent the interquartile range and whiskers show the full range of values. \* $P < 0.05$ , \*\* $P < 0.01$ , \*\*\* $P < 0.005$ , \*\*\*\* $P < 0.0001$ ; n.s., not significant between groups, by two-tailed Student's t-test.

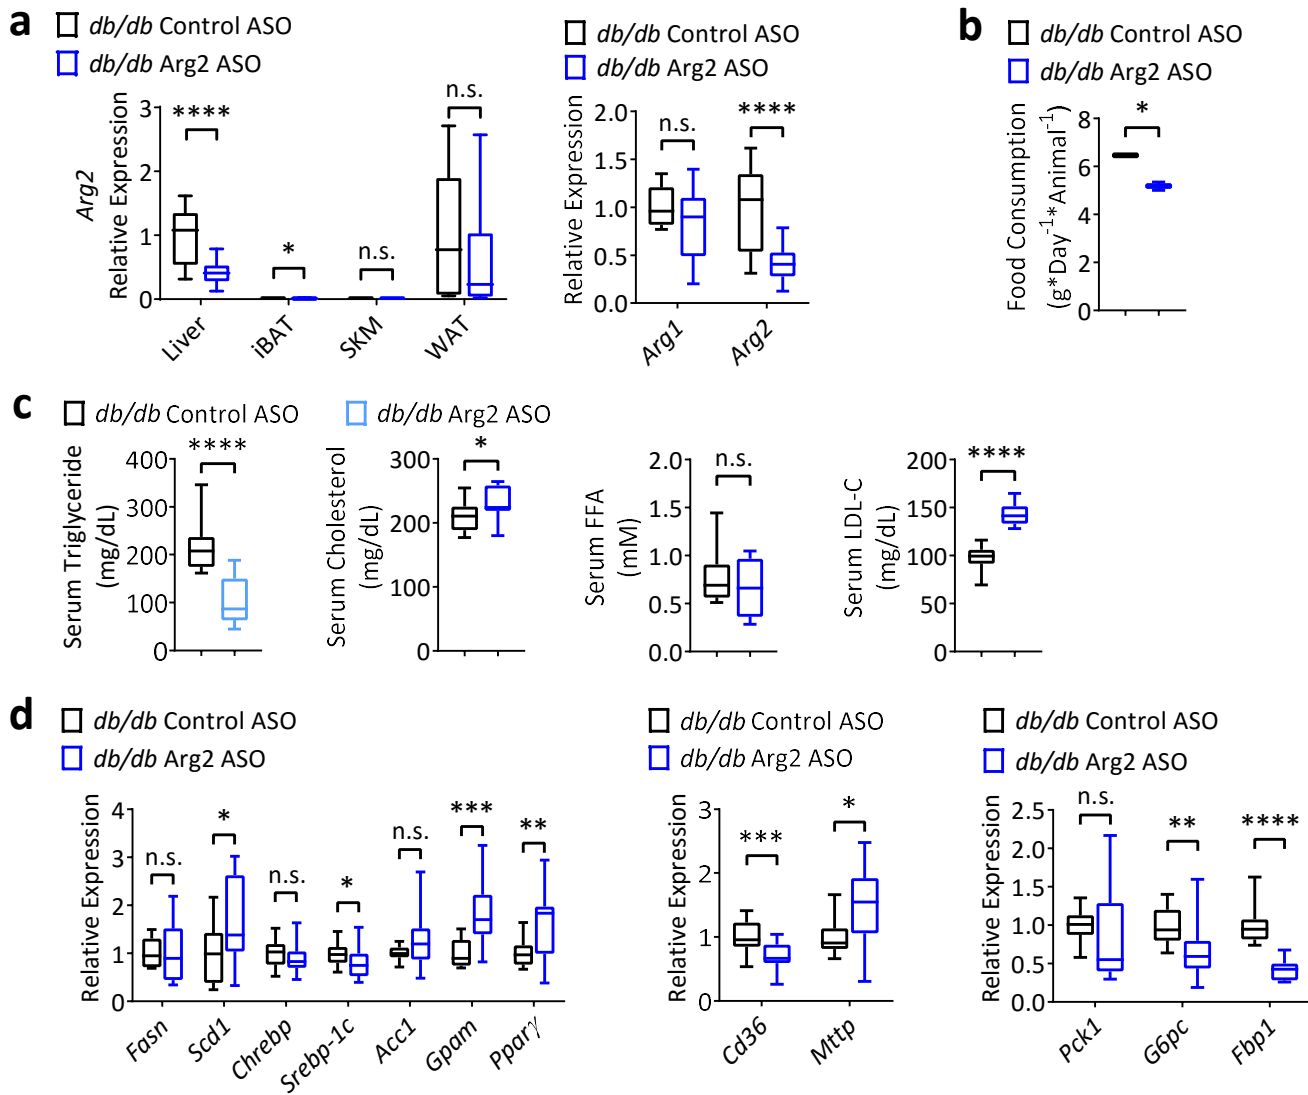

**Supplementary Figure 3.** Impaired energy metabolism in *db/db* mice treated with Arg2 ASO. **(a)** Left, Hepatic and extrahepatic Arg2 mRNA expression in *db/db* Control and Arg2 ASO mice. Right, Arg1 expression in *db/db* Control and Arg2 ASO mice. **(b)** food consumption in *db/db* Control and Arg2 ASO mice. **(c)** Serum triglyceride, cholesterol, non-esterified fatty acid, and LDL-C in *db/db* Control ASO and Arg2 ASO mice **(d)** Hepatic gluconeogenic, lipid import/efflux and oxidative bar graphs, data represent mean + s.e.m. For box plots, the midline represents the median, gene mRNA expression by qPCR in *db/db* Control ASO and Arg2 ASO mice (n = 8 mice per group). For boxes represent the interquartile range and whiskers show the full range of values. \**P* < 0.05, \*\*\*\**P* < 0.0001; n.s., not significant between groups, by two-tailed Student's t-test.

- *db/db* Control ASO
- *db/db* Arg2 ASO

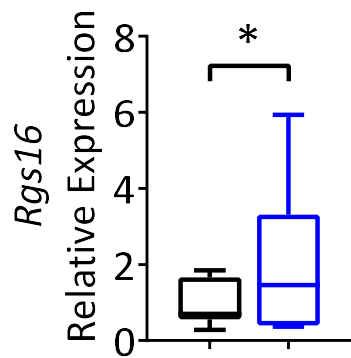

**Supplementary Figure 4.** RGS16 mRNA expression in livers from *db/db* Control and Arg2 ASO mice. (n = 8 mice per group). For boxes represent the interquartile range and whiskers show the full range of values. \*, P < 0.05 vs. control, by two-tailed Student's t-test.

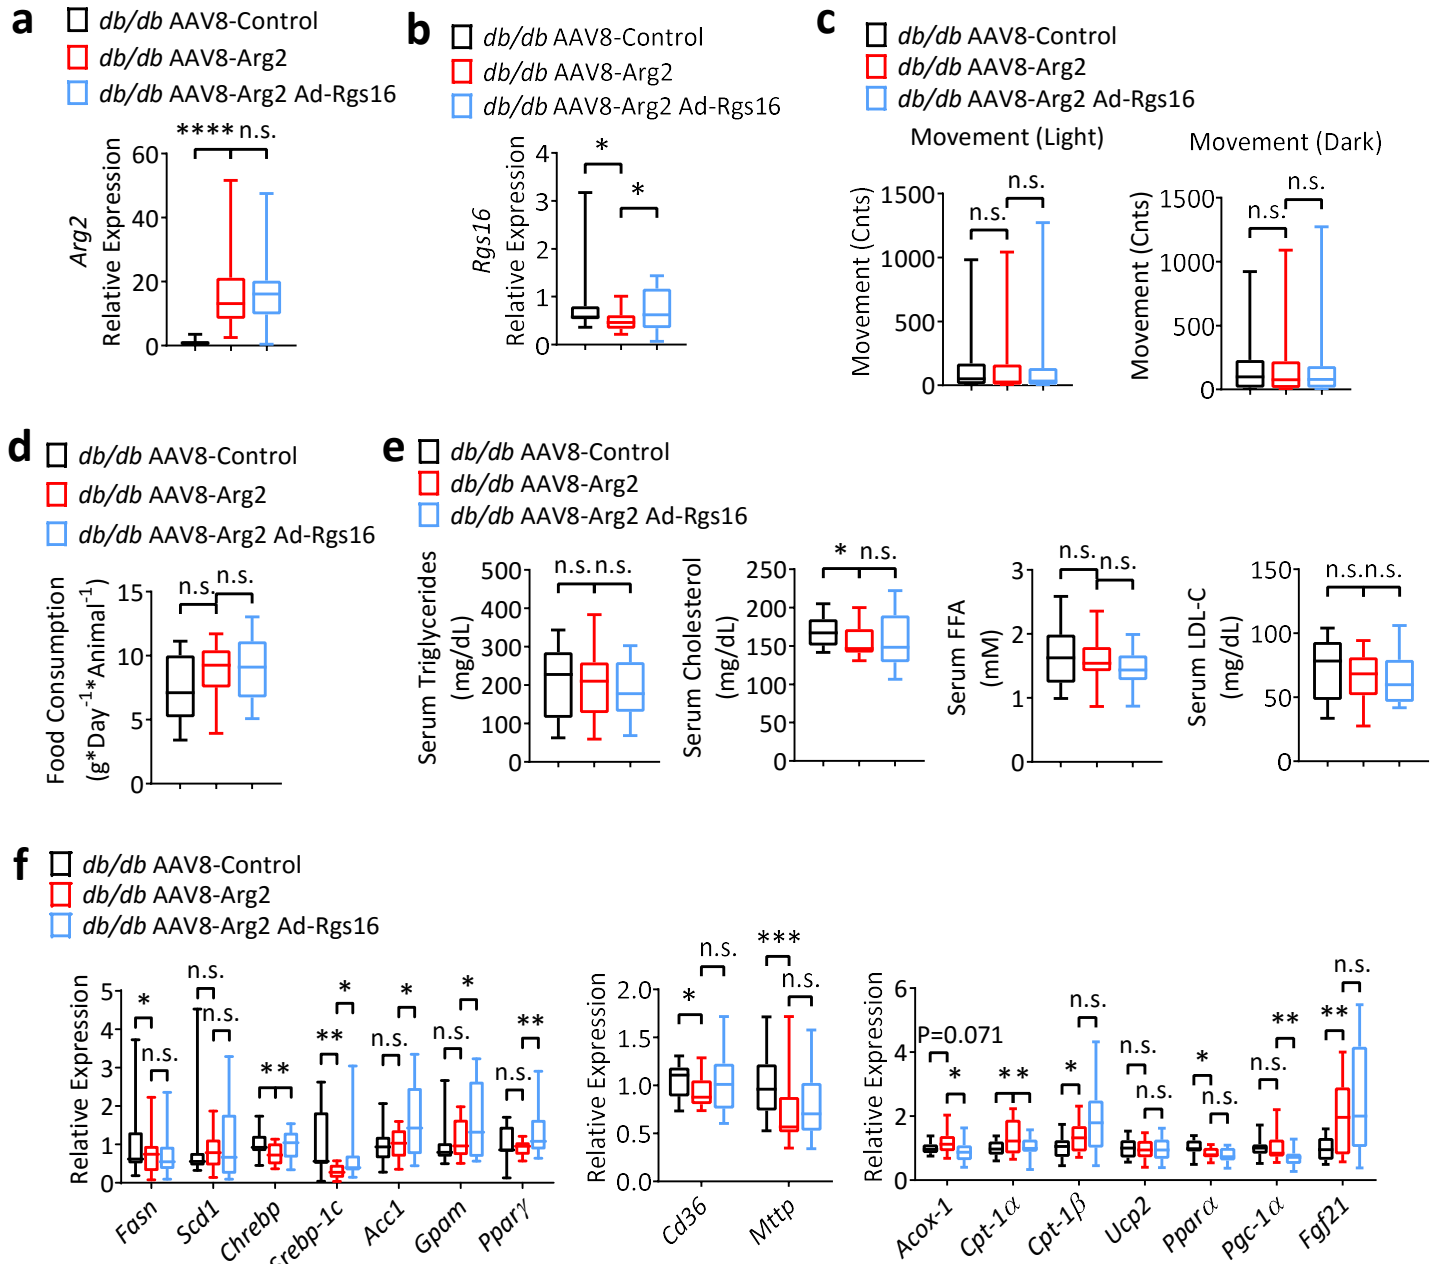

**Supplementary Figure 5.** Hepatic RGS16 reconstitution impairs energy metabolism in Arg2 overexpressing mice. **(a)** Arg2 and **(b)** RGS16 mRNA expression in *db/db* AAV8-Control or AAV8-Arg2 mice overexpressing control vector or RGS16. **(c)** Light and dark cycle locomotion **(d)** food consumption in *db/db* AAV8-Control or AAV8-Arg2 mice overexpressing control vector or RGS16. **(e)** Serum triglycerides, cholesterol, non-esterified fatty acids and LDL-C in *db/db* AAV8-Control or AAV8-Arg2 mice overexpressing control vector or RGS16. **(f)** Hepatic mRNA gene expression of genes involved in de novo lipogenesis, lipid import/efflux and fatty acid oxidation in *db/db* AAV8-Control or AAV8-Arg2 mice overexpressing control vector or RGS16. For box plots, the midline represents the median, boxes represent the interquartile range and whiskers show the full range of values. \* $P < 0.05$ , \*\* $P < 0.01$ , \*\*\* $P < 0.005$ , \*\*\*\* $P < 0.0001$ ; n.s., not significant between groups, by two-tailed Student's t-test.



Figure 1d

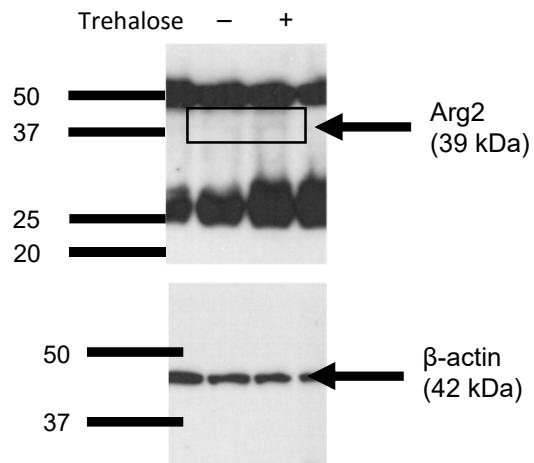

Figure 1e

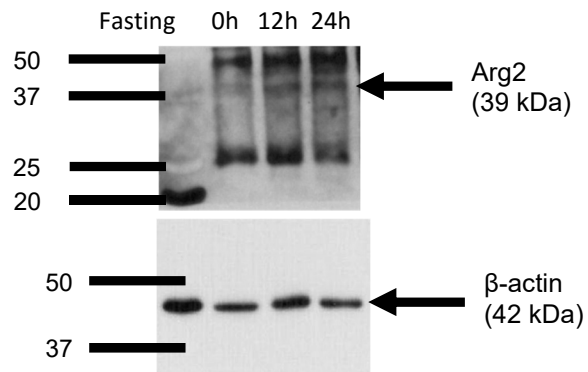

Figure 1h

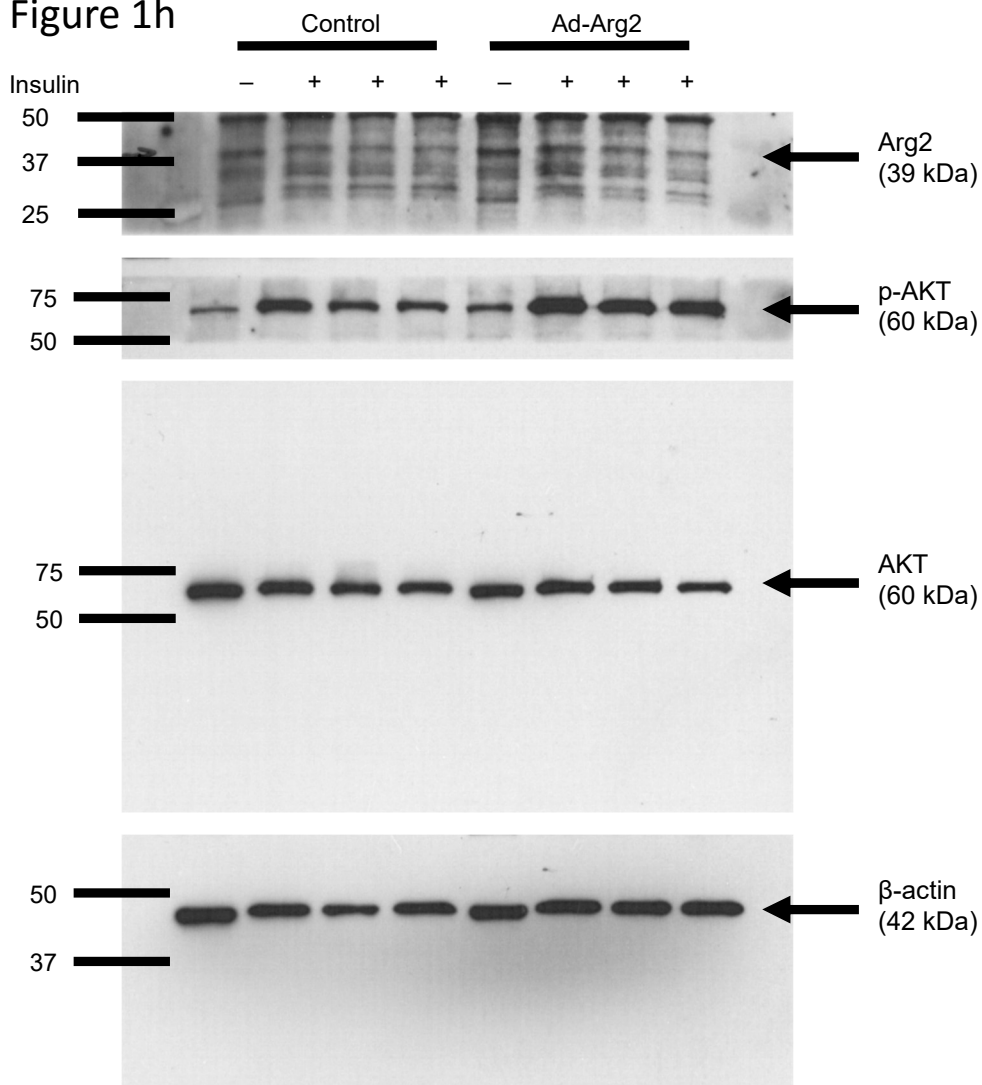

**Supplementary Figure 6.** The uncropped scans of western blots and gels for Figure 1d, 1e, and 1h.

Figure 4h

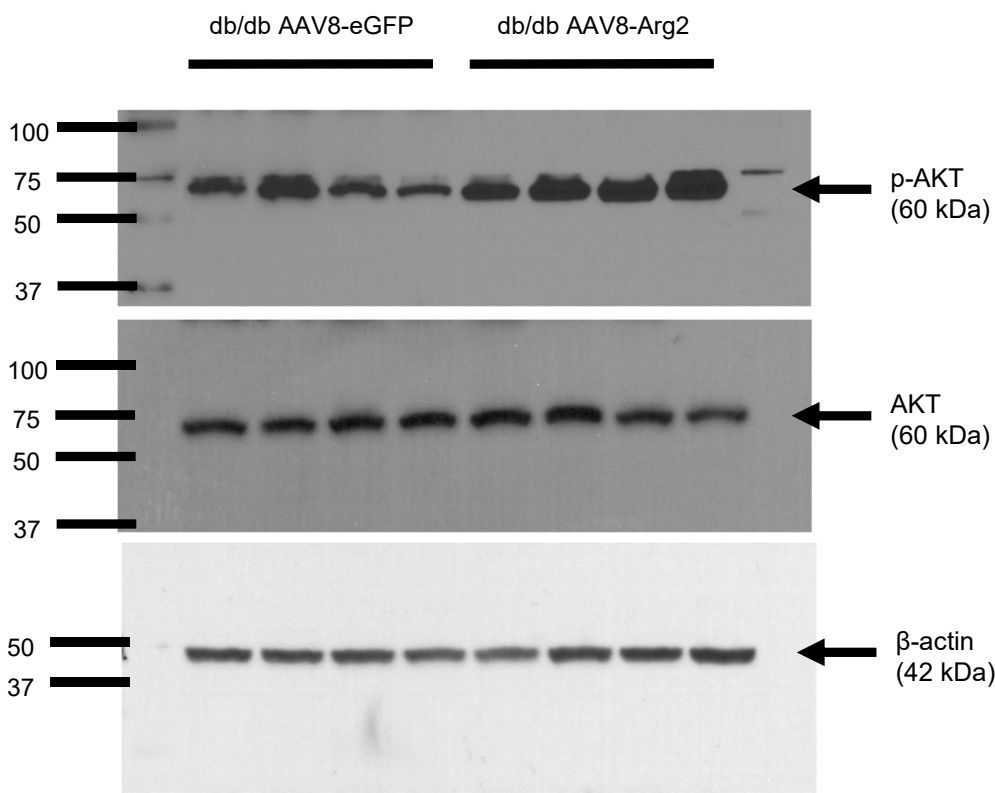

**Supplementary Figure 7.** The uncropped scans of western blots and gels for Figure 4h.

Figure 8f

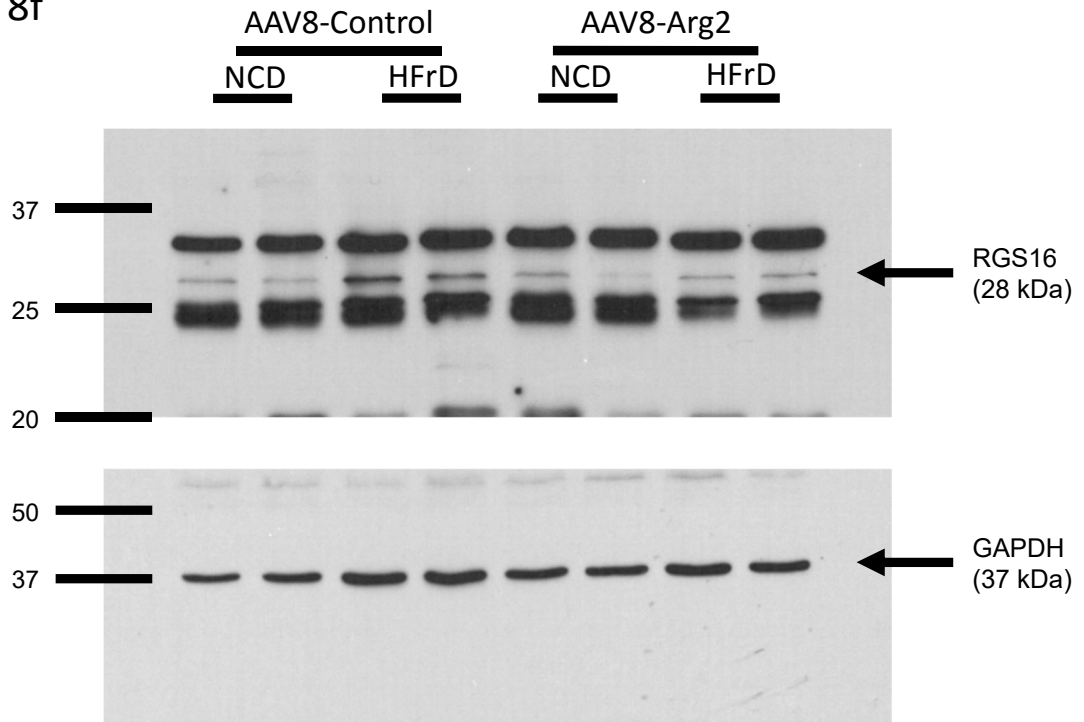

Figure 8g

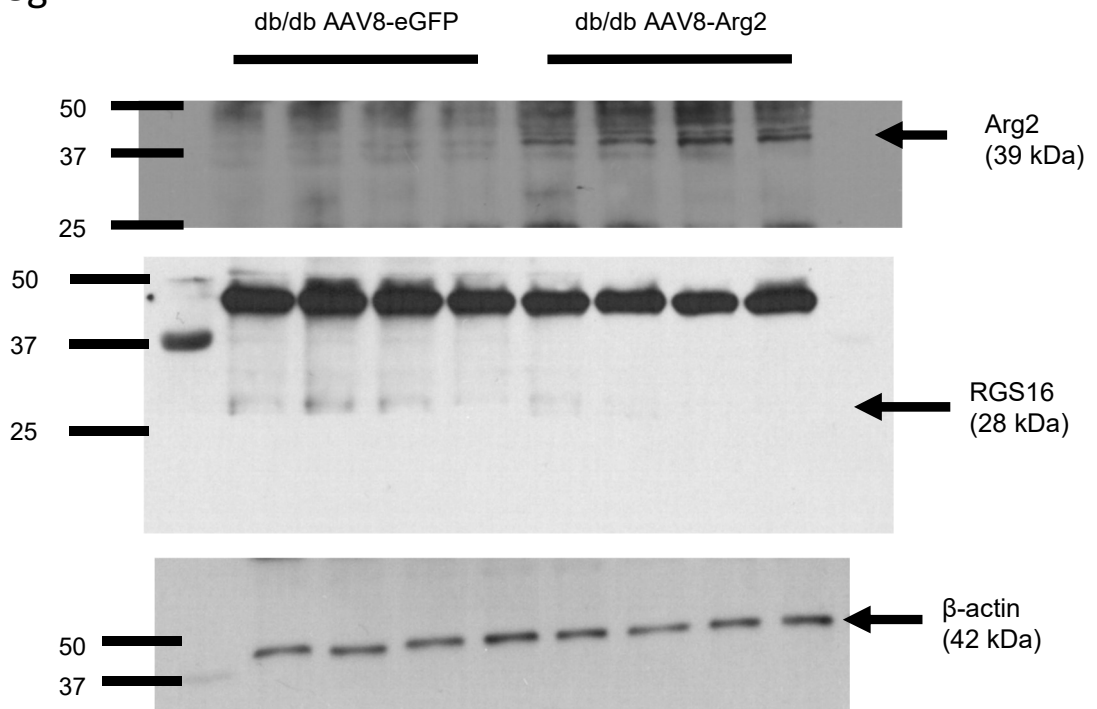

**Supplementary Figure 8.** The uncropped scans of western blots and gels for Figure 8f and 8g.

Figure 9g

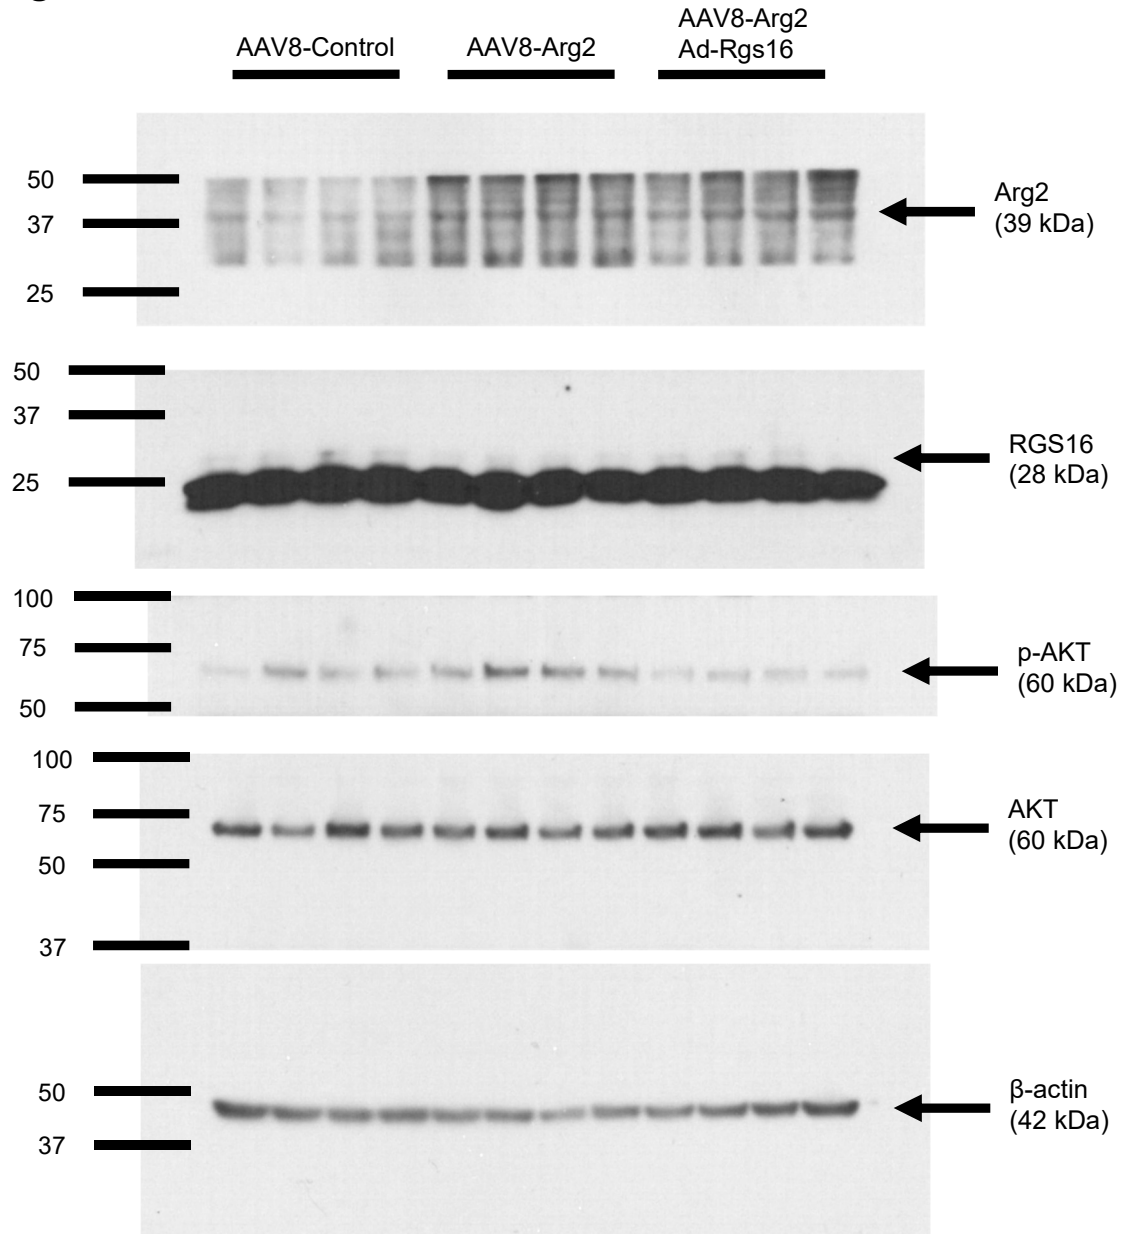

**Supplementary Figure 9.** The uncropped scans of western blots and gels for Figure 9g.

## Supplementary Table 1

| Amino Acid | LIVER                  |                          |              |                   | SERUM               |                    |         |                   |
|------------|------------------------|--------------------------|--------------|-------------------|---------------------|--------------------|---------|-------------------|
|            | db/db AAV8-Control     | db/db AAV8-Arg2          | P Value      | Corrected P Value | db/db AAV8-Control  | db/db AAV8-Arg2    | P Value | Corrected P Value |
| Asp        | 0.2551 ± 0.013         | 0.3207 ± 0.0396          | 0.138        | -                 | 0.139 ± 0.01052     | 0.1795 ± 0.01458 * | 0.039   | 0.8274            |
| <b>Ala</b> | <b>0.8551 ± 0.0415</b> | <b>1.131 ± 0.0589 **</b> | <b>0.002</b> | <b>0.0378*</b>    | 0.1801 ± 0.007167   | 0.2444 ± 0.04159   | 0.127   | -                 |
| Asn        | 0.163 ± 0.00566        | 0.16 ± 0.005645          | 0.711        | -                 | 0.0411 ± 0.002152   | 0.07538 ± 0.02286  | 0.133   | -                 |
| Gly        | 0.03998 ± 0.002461     | 0.0761 ± 0.0158 *        | 0.041        | 0.8526            | 0.007464 ± 0.001199 | 0.0092 ± 0.00258   | 0.536   | -                 |
| Gln        | 0.7092 ± 0.05288       | 0.5686 ± 0.07607         | 0.151        | -                 | 0.5735 ± 0.03747    | 0.6194 ± 0.05859   | 0.510   | -                 |
| Pro        | 45.69 ± 1.139          | 50.35 ± 1.756 *          | 0.043        | 0.9051            | 24.66 ± 2.073       | 34.87 ± 6.82       | 0.153   | -                 |
| Cit        | 0.3072 ± 0.01812       | 0.3784 ± 0.03314         | 0.094        | -                 | 2.688 ± 0.1269      | 2.885 ± 0.241      | 0.466   | -                 |
| His        | 1.43 ± 0.0562          | 1.574 ± 0.06756          | 0.125        | -                 | 0.494 ± 0.01149     | 0.5876 ± 0.08059   | 0.240   | -                 |
| Arg        | 0.0729 ± 0.00416       | 0.1819 ± 0.0370 *        | 0.013        | 0.2646            | 0.0740 ± 0.0096     | 0.1547 ± 0.0412    | 0.063   | -                 |
| Orn        | 0.311 ± 0.00999        | 0.3329 ± 0.0182          | 0.308        | -                 | 1.323 ± 0.05483     | 1.22 ± 0.1443      | 0.496   | -                 |
| Lys        | 3.222 ± 0.127          | 3.439 ± 0.2011           | 0.377        | -                 | 2.561 ± 0.09872     | 2.588 ± 0.2243     | 0.913   | -                 |
| Trp        | 0.1406 ± 0.00505       | 0.1383 ± 0.0044          | 0.735        | -                 | 0.7338 ± 0.04838    | 0.681 ± 0.01231    | 0.340   | -                 |
| Phe        | 5.068 ± 0.1972         | 5.022 ± 0.1748           | 0.865        | -                 | 3.178 ± 0.1261      | 3.6 ± 0.335        | 0.237   | -                 |
| Tyr        | 3.72 ± 0.1219          | 3.496 ± 0.1963           | 0.348        | -                 | 2.603 ± 0.1608      | 3.285 ± 0.3652     | 0.113   | -                 |
| Leu        | 2.589 ± 0.1112         | 2.7 ± 0.1158             | 0.500        | -                 | 2.139 ± 0.1887      | 2.432 ± 0.2701     | 0.380   | -                 |
| Ile        | 1.832 ± 0.0623         | 2.053 ± 0.1144           | 0.112        | -                 | 2.362 ± 0.2032      | 2.931 ± 0.3141     | 0.143   | -                 |
| Met        | 1.725 ± 0.09599        | 1.898 ± 0.1032           | 0.239        | -                 | 1.516 ± 0.162       | 2.038 ± 0.2976     | 0.134   | -                 |
| Val        | 1.551 ± 0.04573        | 1.843 ± 0.1468           | 0.079        | -                 | 2.279 ± 0.1719      | 2.742 ± 0.2977     | 0.188   | -                 |
| Glu        | 1.373 ± 0.09428        | 1.766 ± 0.2292           | 0.135        | -                 | 0.4315 ± 0.0388     | 0.4327 ± 0.0703    | 0.988   | -                 |
| Thr        | 1.611 ± 0.05668        | 1.498 ± 0.0756           | 0.251        | -                 | 1.142 ± 0.038       | 1.218 ± 0.09126    | 0.431   | -                 |
| Ser        | 1.632 ± 0.06994        | 1.725 ± 0.0734           | 0.370        | -                 | 0.7294 ± 0.0304     | 0.9478 ± 0.1761    | 0.214   | -                 |

**Supplementary Table 1.** Targeted metabolomic analysis of hepatic extract amino acid and urea cycle intermediaries from *db/db* AAV8-Control and AAV8-Arg2 mice. Data are shown as mean peak height:internal standard ratio (n = 8 mice per group). \*,  $P < 0.05$ .

## Supplementary Table 2 qPCR primers

| Genes          | Forward (5' - 3')              | Reverse (5' - 3')                   |
|----------------|--------------------------------|-------------------------------------|
| 36B4           | TAA AGA CTG GAG ACA AGG TG     | GTG TAC TCA GTC TCC ACA GA          |
| Acc1           | TGT CCG CAC TGA CTG TAA CCA    | TGC TCC GCA CAG ATT CTT CA          |
| Acox1          | CCT GAT TCA GCA AGG TAG GG     | TCG CAG ACC CTG AAG AAA TC          |
| Arg2           | AGG AGT GGA ATA TGG TCC AGC    | AGG GAT CAT CTT GTG GGA CAT T       |
| Ass1           | ACA CCT CCT GCA TCC TCG T      | GCT CAC ATC CTC AAT GAA CAC CT      |
| Ccl2           | TTA AAA ACC TGG ATC GGA ACC AA | GCA TTA GCT TCA GAT TTA CGG GT      |
| Cd36           | GGA ACT GTG GGC TCA TTG C      | CAT GAG AAT GCC TCC AAA CAC         |
| Chrebp         | CTG GGG ACC TAA ACA GGA GC     | GAA GCC ACC CTA TAG CTC CC          |
| Cpt-1 $\alpha$ | AGT GGC CTC ACA GAC TCC AG     | GCC CAT GTT GTA CAG CTT CC          |
| Cpt-1 $\beta$  | GCA CAC CAG CAG GCA GTA GCT TT | CAG GAG TTG ATT CCA GAC AGG TA      |
| Cxcl9          | GGA GTT CGA GGA ACC CTA GTG    | GGG ATT TGT AGT GGA TCG TGC         |
| Fasn           | CCT GGA TAG CAT TCC GAA CCT    | AGC ACA TCT CGA AGG CTA CAC A       |
| Fbp1           | CAC CGC GAT CAA AGC CAT CT     | AGG TAG CGT AGG ACG ACT TCA         |
| Fgf21          | CTG CTG GGG GTC TAC CAA G      | CTG CGC CTA CCA CTG TTC C           |
| G6pc           | TCT GTC CCG GAT CTA CCT TG     | GCT GGC AAA GGG TGT AGT GT          |
| Gck            | TGT GGC CAC CGT GTC ATT C      | CAA CTG GAC CAA GGG CTT CAA         |
| Gpam           | CAA CAC CAT CCC CGA CAT C      | GTG ACC TTC GAT TAT GCG ATC A       |
| Igfp1          | CCA TCC TGT GGA ACG CCA TC     | TCT TGT TGC AGT TTG GCA GAT A       |
| Il-1 $\beta$   | GCA ACT GTT CCT GAA CTC AAC T  | ATC TTT TGG GGT CCG TCA ACT         |
| Il-6           | CTG CAA GAG ACT TCC ATC CAG    | AGT GGT ATA GAC AGG TCT GTT GG      |
| Irs1           | CGA TGG CTT CTC AGA CGT G      | CAG CCC GCT TGT TGA TGT TG          |
| Mogat1         | TGG TGC CAG TTT GGT TCC AG     | TGC TCT GAG GTC GGG TTC A           |
| Mttp           | ATG ATC CTC TTG GCA GTG CTT    | TGA GAG GCC AGT TGT GTG AC          |
| Pck1           | GAT GGG CAT ATC TGT GCT GG     | CAG CCA CCC TTC CTC CTT AG          |
| Pgc1 $\alpha$  | ACA CCG CAA TTC TCC CTT GT     | CGG CGC TCT TCA ATT GCT TT          |
| Ppara $\alpha$ | TGG TTC CTG GTG CCG ATT TA     | ACT AGC ATC CCA CTT AAT TAT GTA TCT |
| Ppar $\gamma$  | CCA CCA ACT TCG GAA TCA GCT    | TTT GTG GAT CCG GCA GTT AAG A       |
| Rgs16          | CCA TGC CTT CCT AAA GAC GGA    | GTA CTC GTC AAA GAT GTG GTG AG      |
| Srebp-1c       | CCA TGG ATT GCA CAT TTG AA     | GGC CAG GGA AGT CAC TGT CTT         |
| Tnfa           | CAG GCG GTG CCT ATG TCT C      | CGA TCA CCC CGA AGT TCA GTA G       |
| Ucp2           | ATG GTT GGT TTC AAG GCC ACA    | CGG TAT CCA GAG GGA AAG TGA T       |
